# Supplementary material for: Assessment of ampicillin removal efficiency from aqueous solution by polydopamine/zirconium(iv) iodate: optimization by response surface methodology
Source: Royal Society of Chemistry journal article supplement (doi:10.1039/d0ra02061c), 2020-01-01
Supplement: d0ra02061c1.pdf [file d0ra02061c1.pdf]

## Assessment of ampicillin removal efficiency from aqueous solution by polydopamine/zirconium (IV) iodate: Optimization by response surface methodology.

Nafisur Rahman\* and Poornima Varshney

Department of Chemistry

Aligarh Muslim University

Aligarh- 202002 (INDIA)

Email: [nafisurrahman05@gmail.com](mailto:nafisurrahman05@gmail.com)

### Supporting information

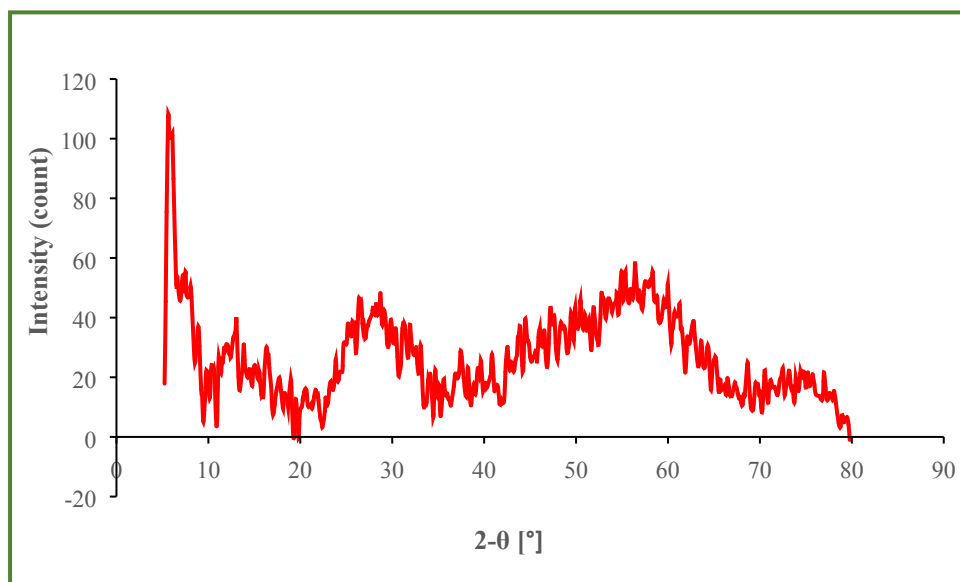

**Fig. S1:** XRD diffractogram for PDA/ZI composite.

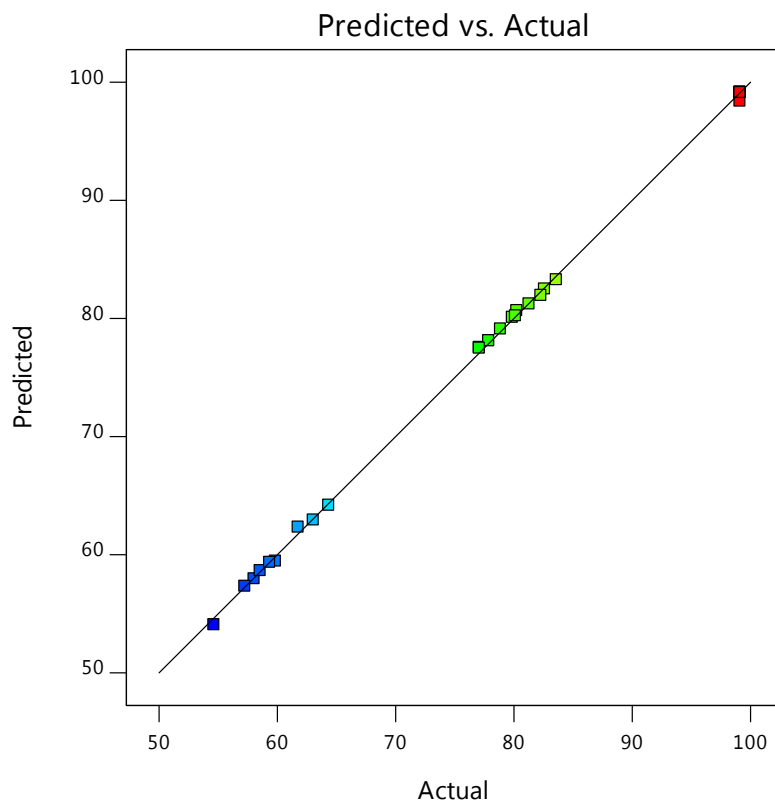

**Fig. S2:** Plot of actual vs. predicted responses for removal of ampicillin.

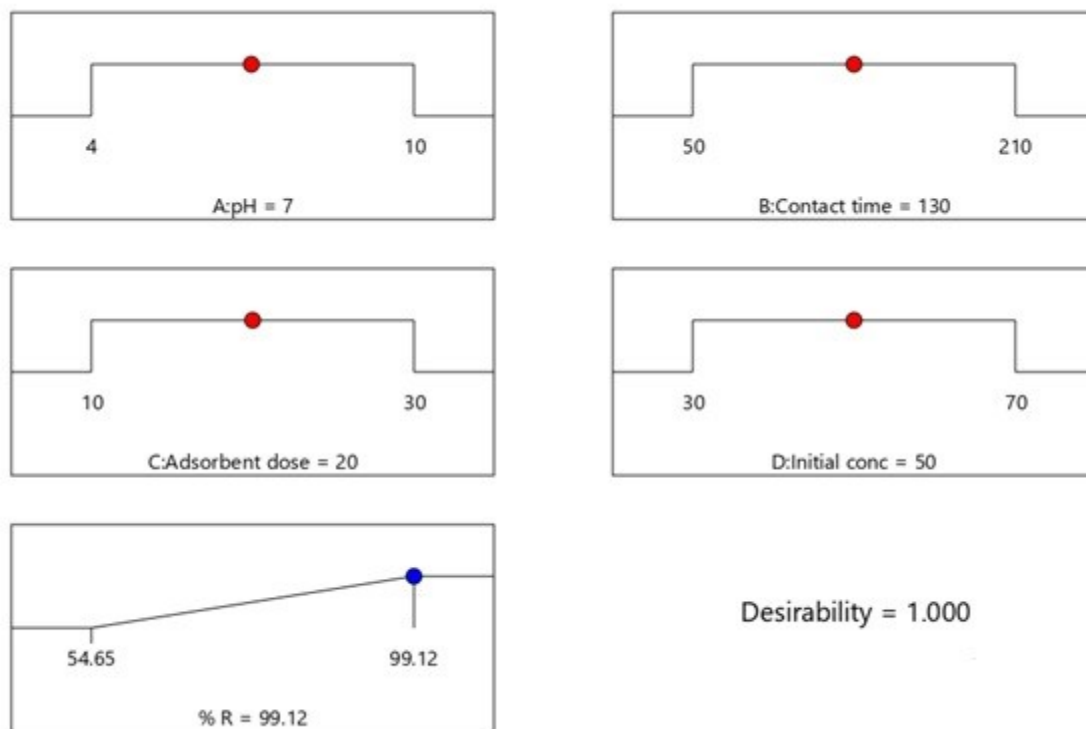

**Fig. S3:** Desirability ramp for numerical optimization of four independent variables, pH, contact time, adsorbent dose and initial concentration for adsorption of ampicillin onto PDA/ZI composite.

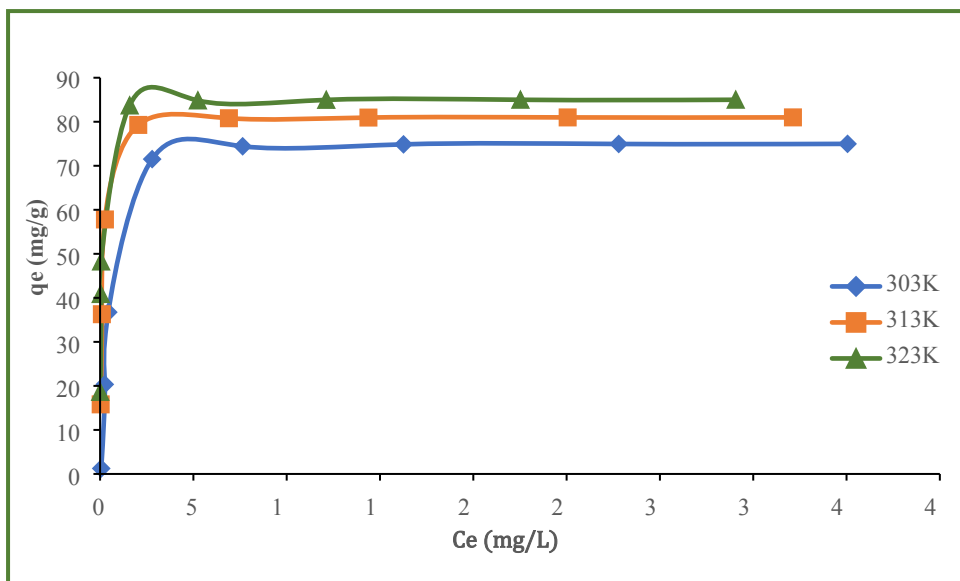

**Fig. S4:** Nonlinear plots of Dubinin- Radushkevich adsorption isotherm model for adsorption of ampicillin onto PDA/ZI at different temperatures (pH: 7; contact time: 130 min; adsorbent dose: 1.0 g/L).

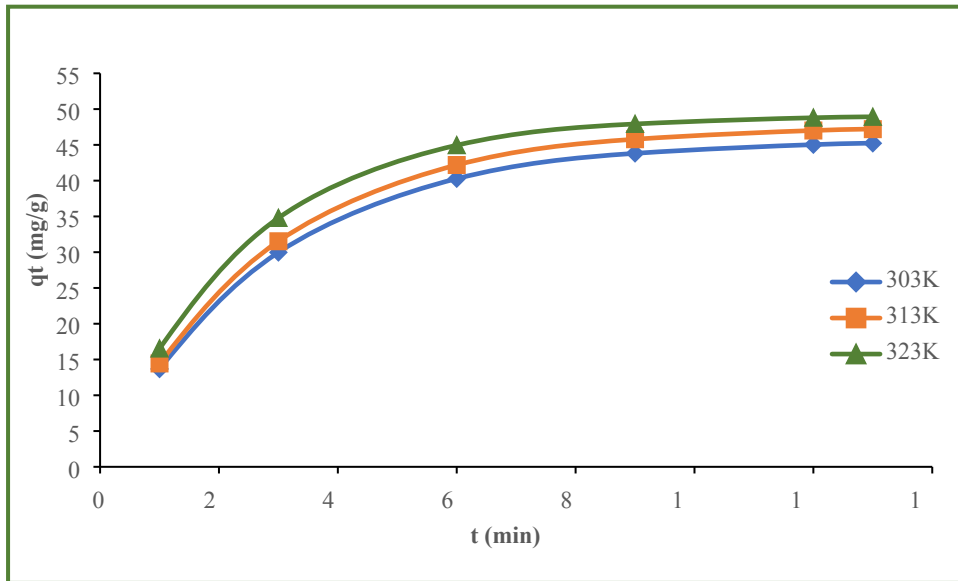

**Fig. S 5:** Nonlinear plot of Pseudo-first-order kinetic model for the adsorption of ampicillin onto PDA/ZI composite at different temperatures (contact time: 130 min; adsorbent dose: 1.0 g/L).

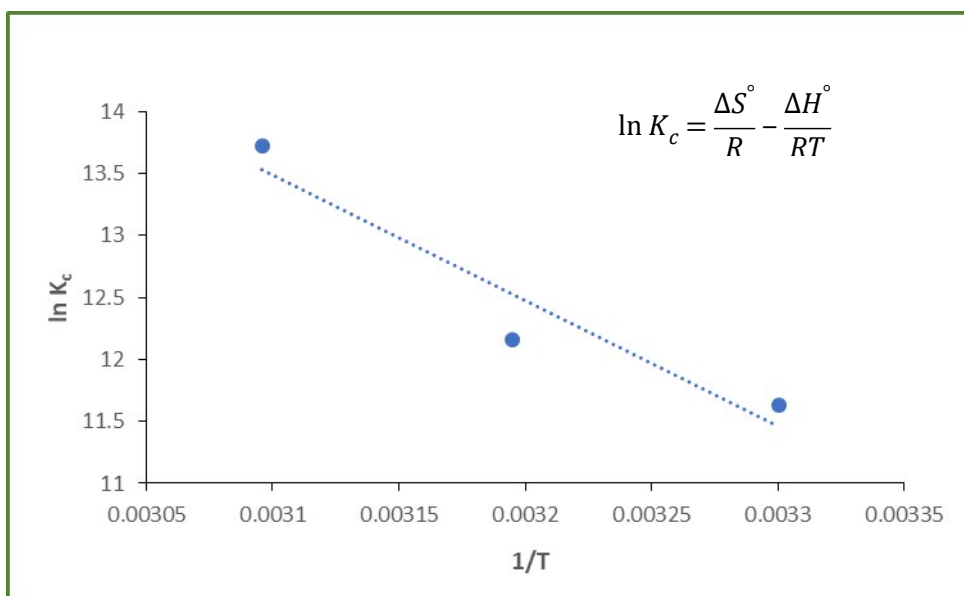

**Fig. S6:** Van't Hoff plot for adsorption of ampicillin onto PDA/ZI composite.

**Table S1:** Experimental variables and their levels in Box-Behnken design.

| Factors | Variables             | Unit    | Range and coded levels |                     |                        |
|---------|-----------------------|---------|------------------------|---------------------|------------------------|
|         |                       |         | Low factorial<br>(-1)  | Center point<br>(0) | High factorial<br>(+1) |
| A       | pH                    | -       | 4.00                   | 7.00                | 10.00                  |
| B       | Contact time          | min     | 50.00                  | 130.00              | 210.00                 |
| C       | Adsorbent dose        | mg/20mL | 10.00                  | 20.00               | 30.00                  |
| D       | Initial concentration | mg/L    | 30.00                  | 50.00               | 70.00                  |

**Table S2:** Model statistics for removal of ampicillin using PDA/ZI composite.

| <b>Model</b>            | <b>Std.<br/>Dev.</b> | <b>F- value</b> | <b>p- value</b>   | <b>R<sup>2</sup></b> | <b>Adjusted<br/>R<sup>2</sup></b> | <b>Predicted<br/>R<sup>2</sup></b> | <b>PRESS</b> | <b>Remark</b>    |
|-------------------------|----------------------|-----------------|-------------------|----------------------|-----------------------------------|------------------------------------|--------------|------------------|
| Linear                  | 11.45                | 6.85            | 0.0008            | 0.5330               | 0.4552                            | 0.4178                             | 3925.27      |                  |
| 2-factor<br>interaction | 13.19                | 0.0139          | 1.0000            | 0.5352               | 0.2769                            | 0.1367                             | 5820.21      |                  |
| <b>Quadratic</b>        | <b>0.4137</b>        | <b>4574.71</b>  | <b>&lt;0.0001</b> | <b>0.9996</b>        | <b>0.9993</b>                     | <b>0.9980</b>                      | <b>13.80</b> | <b>Suggested</b> |
